# Supplementary material for: The allosteric modulation of complement C5 by knob domain peptides
Source: eLife. 2021 Feb 11;10:e63586. doi: 10.7554/eLife.63586 (PMC7972453; doi:10.7554/eLife.63586)

**Supplementary File**

**The allosteric modulation of Complement C5 by knob domain peptides**

Alex Macpherson1,2*, Maisem Laabei2, Zainab Ahdash1, Melissa Graewert3,4, James R. Birtley1, Monika-Sarah E.D. Schulze1, Susan Crennell2, Sarah A. Robinson4, Ben Holmes1, Vladas Oleinikovas1, Per H. Nilsson5,6, James Snowden1, Victoria Ellis1, Tom Eirik Mollnes6,7,8, Charlotte M. Deane4, Dmitri Svergun3, Alastair D.G. Lawson1 and Jean van den Elsen2,9*

1 UCB, Slough, UK. SL1 3WE;

2 Department of Biology and Biochemistry, University of Bath, Bath, UK. BA2 7AX;

3 European Molecular Biology Laboratory, Hamburg Unit, 22607 Hamburg, Germany;

4 Department of Statistics, University of Oxford, Oxford, UK;

5 Department of Chemistry and Biomedicine, Linnaeus University, 391 82 Kalmar, Sweden;

6 Department of Immunology, Oslo University Hospital, University of Oslo, Oslo, Norway;

7 Research Laboratory, Bodø Hospital, K.G. Jebsen TREC, University of Tromsø, Tromsø, Norway;

8 Centre of Molecular Inflammation Research, Norwegian University of Science and Technology, Trondheim, Norway;

9 Centre for Therapeutic Innovation, University of Bath, Bath, UK. BA2 7AX

*email [alex.macpherson@ucb.com](mailto:alex.macpherson@ucb.com) and [bssjmhve@bath.ac.uk](mailto:bssjmhve@bath.ac.uk)

**Section 1. Functional analyses**

**Table 1.1. Classical pathway C5b deposition ELISA.**

Data from *n=3*, unless specified.

| **Construct** | **Geomean IC50 (nM)** | **Range (nM)** | **Average Emax (%)** | **Range (%)** |
| --- | --- | --- | --- | --- |
| **K8a** | 9.3 | 3.0-24.5 | 68.2 | 59.5 – 79.56 |
| **K57** | 3.6 | 2.4 – 7.3 | 100.6 | 99.1 – 101.7 |
| **K92** | ND* | ND* | ND* | ND* |
| **K149** | ND* | ND* | ND* | ND* |

*ND = Not detected.

a Data are an average from *n=6*

**Table 1.2. Alternative pathway C5b deposition ELISA.**

Data from *n=3*, unless specified.

| **Construct** | **Geomean IC50 (nM)** | **Range (nM)** | **Average Emax (%)** | **Range (%)** |
| --- | --- | --- | --- | --- |
| **K8 a** | 29.2 | 25.4 – 34.2 | 91.8 | 91.4 – 92.3 |
| **K57** | 30.4 | 22.7 – 52.1 | 110.3 | 97.9 – 134.0 |
| **K92b** | 32.4 | 31.5 - 33.1 | 62.14 | 58.0 - 67.7 |
| **K149** | ND* | ND* | ND* | ND* |

*ND = Not detected.

a Data are an average from *n=5*

b Data are an average from *n=4*

**Table 1.3. Inhibition of classical pathway mediated C5a release.**

Data from *n=3* independent titrations, unless otherwise stated

| **Construct** | **Geomean IC50 (nM)** | **Range (nM)** | **Average Emax (%)** | **Range (%)** |
| --- | --- | --- | --- | --- |
| **K8 a** | 9.9 | 3.9 – 18.7 | 57.7 | 51.5 – 73.2 |
| **K57** | 4.0 | 2.8 - 5.6 | 98.7 | 95.9 - 100.6 |
| **K92** | ND* | ND* | ND* | ND* |
| **K149** | ND* | ND* | ND* | ND* |

*ND = Not detected.

a Data are an average from *n=5*

**Table 1.4. Inhibition of alternative pathway mediated C5a release.**

Data from *n=3*, unless otherwise stated

| **Construct** | **Geomean IC50 (nM)** | **Range (nM)** | **Average Emax (%)** | **Range (%)** |
| --- | --- | --- | --- | --- |
| **K8a** | 150.2 | 49.3 – 85.86 | 71.8 | 49.3 – 85.9 |
| **K57** | 26.6 | 25.0-27.7 | 97.8 | 95.1 - 101.3 |
| **K92** | 43.3 | 39.9 – 45.3 | 43.3 | 39.9 – 45.2 |
| **K149** | ND* | ND* | ND* | ND* |

*ND = Not detected.

a Data are an average from *n=4*

**Table 1.5. Inhibition of classical pathway mediated C9 deposition.**

Data from *n=3*

| **Construct** | **Geomean IC50 (nM)** | **Range (nM)** | **Average Emax (%)** | **Range (%)** |
| --- | --- | --- | --- | --- |
| **K8#** | - | - | 63.4 | - |
| **K57** | 1.9 | 1.3-2.5 | 97.9 | 92.4 - 97 .9 |
| **K92** | ND* | ND* | ND* | ND* |
| **K149** | ND* | ND* | ND* | ND* |

*ND = Not detected.

# Hill slopes < 0.5 IC50 values not reported.

**Table 1.6. Inhibition of alternative pathway mediated C9 deposition.**

Data from *n=3*, unless otherwise stated.

| **Construct** | **Geomean IC50 (nM)** | **Range (nM)** | **Average Emax (%)** | **Range (%)** |
| --- | --- | --- | --- | --- |
| **K8** | 232.4 | 131.3 – 521.5 | 73.3 | 61.2 – 90.74 |
| **K57** | 24.5 | 20.6 - 27.6 | 100.7 | 100.1 - 100.9 |
| **K92** | 791.9 | 759.8 - 846.7 | 44.2 | 40.9 – 45.9 |
| **K149** | ND* | ND* | ND* | ND* |

*ND = Not detected.

**Table 1.7. Inhibition of classical pathway haemolysis.**

Data from *n=3*

| **Construct** | **Geomean IC50 (nM)** | **Range (nM)** | **Average Emax (%)** | **Range (%)** |
| --- | --- | --- | --- | --- |
| **K8#** | - | - | 95.6 | 91.7 – 99.7 |
| **K57** | 5.3 | 4.9 – 5.7 | 99.7 | 99.2 –100.1 |
| **K92** | ND* | ND* | ND* | ND* |

*ND = Not detected.

# curves not well described by a 4-PL fit, IC50 values not reported.

**Table 1.8. Inhibition of alternative pathway haemolysis.**

Data from *n=3*

| **Construct** | **Geomean IC50 (nM)** | **Range (nM)** | **Average Emax (%)** | **Range (%)** |
| --- | --- | --- | --- | --- |
| **K8** | ND* | ND* | ND* | ND* |
| **K57** | 402.7 | 218 – 660 | 102.2 | 90.9 – 109.6 |
| **K92** | 16.9 | 11.41 – 21.8 | 31.4 | 24.1 – 45.3 |

*ND = Not detected.

**Section 2. Structural analysis**

**Table 2.1. Data collection and refinement statistics (molecular replacement)**

| **Data collection** | **C5-K8** | **C5-K92** |
| --- | --- | --- |
| Space group | P 21 21 21 | C 1 2 1 |
| Cell dimensions |  |  |
| *a*, *b*, *c* (Å) | 81.56, 161.69, 187.38 | 204.27, 104.29, 154.88 |
| α, β, γ (°) | 90, 90, 90 | 90, 124.89, 90 |
| Resolution (Å) | 81.07-2.3 (2.382-2.3)[a](https://www.ncbi.nlm.nih.gov/pmc/articles/PMC5383516/table/T1/#TFN1) | 83.77-2.75 (2.848-2.75) |
| *R*merge | 0.043 (0.361) | 0.018 (0.204) |
| *I* / σ*I* | 13.17 (2.07) | 28.79 (4.38) |
| CC1/2 | 0.99 (0.67) | 0.99 (0.92) |
| Completeness (%) | 0.99 (0.99) | 0.99 (0.99) |
| Redundancy | 2.0 (2.0) | 2.0 (2.0) |
| **Refinement** |  |  |
| Resolution (Å) | 81.56-2.3 | 83.77-2.75 |
| No. reflections | 110479 (10914) | 69381 (6877) |
| *R*work / *R*free | 0.202/0.234 | 0.219/0.253 |
| No. atoms (non-H) | 12100 | 13095 |
| Protein | 11618 | 13024 |
| Ligand/ion | 80 | 59 |
| Water | 402 | 12 |
| *B* factors |  |  |
| Protein | 65.4 | 100.5 |
| Ligand/ion | 87.9 | 122.7 |
| Water | 51.9 | 65.3 |
| r.m.s. deviations |  |  |
| Bond lengths (Å) | 0.003 | 0.002 |
| Bond angles (°)  Ramachandran plot (%)  Favoured  Allowed  Outliers  Clash score | 0.62  97.2  2.8  0  3.3 | 0.58  95.2  4.8  0  6.7 |

aValues in parentheses are for highest-resolution shell.

**Table 2.2. Hydrogen bond interactions between K8 and C5**

Hydrogen bonding interactions as defined by the PDBePiSA macromolecular interfaces tool.

| **K8** | | **C5** | |
| --- | --- | --- | --- |
| *Hydrogen bonds (18)* | | | |
| A14 | O | N | L1379 |
| G16 | N | O | L1379 |
|  | O | N | I1381 |
| S18 | N | OD2 | D1382 |
|  | OG | NZ | K1380 |
| R23 | NH1 | O | E1373 |
|  |  | O | S1371 |
|  | NH2 | O | E1373 |
| D25 | OD2 | OH | Y1378 |
|  | OD2 | NZ | K1409 |
| R32 | NH1 | OD2 | D1471 |
|  | NH2 | OD1 |  |
| H36 | NE2 | OD1 | D1382 |
| G43 | N | OG | S1407 |
| N44 | N | O | S1469 |
|  | ND2 | O | S1470 |
| R45 | NH1 | O | S1411 |
|  | NH2 | O | E1414 |

**Table 2.3. Ionic interactions between K8 and C5.**

Ionic interactions as defined by the PDBePiSA macromolecular interfaces tool.

| **K8** | | **C5** | |
| --- | --- | --- | --- |
| *Ionic interactions (5)* | | | |
| D25 | OD2 | NZ | K1409 |
| R32 | NH1 | OD2 | D1471 |
|  | NH2 | OD1/OD2 |  |
| H36 | NE2 | OD1 | D1382 |

**Table 2.4. Disulphide mapping of the K92 peptide.**

| Intensities and resulting % (by total intensity) for the various peptides linked by a single disulphide bond as identified by Biopharma Finder. | | |
| --- | --- | --- |
| **Cysteine Pairing** | **Intensitya** | **% (by total intensity)** |
| Cys23 to Cys9 | 150564035 | 62.71 |
| Cys18 to Cys2 | 85987873 | 35.81 |
| Cys23 to Cys2 | 2796033 | 1.16 |
| Cys23 to Cys23 | 527299 | 0.22 |
| Cys18 to Cys9 | 166812 | 0.07 |
| Cys23 to Cys18 | 17112 | 0.01 |
| Cys2 to Cys2 | 15354 | 0.01 |
| Cys18 to Cys18 | 11924 | 0.00 |
| Cys2 to Cys9 | 5193 | 0.00 |
| a Sum of intensities of all peptides (containing a single disulphide bond) identified by Biopharma Finder as containing the same paired cysteines. | | |

**Table 2.5. Hydrogen bond interactions between K92 and C5.**

Hydrogen bonding interactions as defined by the PDBePiSA macromolecular interfaces tool.

| **K92** | | **C5** | |
| --- | --- | --- | --- |
| ***Hydrogen bonds (8)*** | | | |
| G22 | N | OD1 | N81 |
| H25 | NE2 | O | A77 |
| F26 | N | O | F512 |
| I13 | O | ND2 | N533 |
| C23 | O | ND2 | N38 |
|  | O | OG | S82 |
|  | N | OG | S82 |
| G24 | O | N | F512 |

**Table 2.6.** **Validation of molecular interactions by peptide mutagenesis analysis.**

Summary of SPR multi-cycle kinetics

| **knob domain** | **mean kon (m s-1)** | **kon SE** | **mean koff** | **koff SD** | **mean KD (M)** | **mean stoich. ratio** |
| --- | --- | --- | --- | --- | --- | --- |
| K92 | 2.83E+05 | 3.79E+04 | 1.01E-04 | 6.32E-05 | 4.11E-10 | 0.40 |
| K92 W21A | 1.74E+04 | 7.10E+02 | 8.48E-03 | 1.13E-03 | 4.97E-07 | 0.62 |
| K92 F26A | 1.84E+05 | 2.58E+04 | 3.28E-03 | 7.12E-04 | 1.88E-08 | 0.65 |
| K8 | 7.05E+04 | 8.23E+02 | 3.85E-04 | 3.25E-05 | 5.46E-09 | 0.25 |
| K8 R22A | 5.40E+04 | 1.65E+03 | 5.99E-04 | 6.31E-05 | 1.12E-08 | 0.27 |
| K8 R31A | 4.62E+02 | 9.45E+01 | 1.52E-03 | 2.86E-04 | 3.91E-06 | 0.75 |

*n=1*

|  | **kon** | **koff** | **KD (M)** | **stoich. ratio** |
| --- | --- | --- | --- | --- |
| K92 | 1.86E+05 | 8.17E-05 | 4.40E-10 | 0.54 |
| K92 W21A | 1.91E+04 | 8.35E-03 | 4.37E-07 | 0.60 |
| K92 F26A | 2.71E+05 | 4.03E-03 | 1.49E-08 | 0.67 |
| K8 | 7.10E+04 | 3.72E-04 | 5.24E-09 | 0.28 |
| K8 R22A | 5.92E+04 | 5.65E-04 | 9.54E-09 | 0.29 |
| K8 R31A | 7.86E+02 | 1.82E-03 | 2.32E-06 | 0.36 |

*n=2*

|  | **kon** | **koff** | **KD (M)** | **stoich. ratio** |
| --- | --- | --- | --- | --- |
| K92 | 4.08E+05 | 5.00E-05 | 1.23E-10 | 0.33 |
| K92 W21A | 1.81E+04 | 7.42E-03 | 4.11E-07 | 0.57 |
| K92 F26A | 1.21E+05 | 2.61E-03 | 2.15E-08 | 0.63 |
| K8 | 7.26E+04 | 4.22E-04 | 5.81E-09 | 0.23 |
| K8 R22A | 5.35E+04 | 6.72E-04 | 1.26E-08 | 0.24 |
| K8 R31A | 3.36E+02 | 1.25E-03 | 3.72E-06 | 0.71 |

*n=3*

|  | **kon** | **koff** | **KD (M)** | **stoich. ratio** |
| --- | --- | --- | --- | --- |
| K92 | 2.56E+05 | 1.72E-04 | 6.72E-10 | 0.32 |
| K92 W21A | 1.50E+04 | 9.66E-03 | 6.44E-07 | 0.68 |
| K92 F26A | 1.61E+05 | 3.21E-03 | 1.99E-08 | 0.65 |
| K8 | 6.78E+04 | 3.61E-04 | 5.32E-09 | 0.24 |
| K8 R22A | 4.94E+04 | 5.61E-04 | 1.13E-08 | 0.27 |
| K8 R31A | 2.63E+02 | 1.49E-03 | 5.68E-06 | 1.18 |

**Table 2.7. Individual, total and average hydrogen bond persistence in a binding pose metadynamics simulation of the K8-C5 complex.**

| **HBond K8** | **HBond C5** | **Persistence score** |
| --- | --- | --- |
| 14:O | 1379:H | 1.000 |
| 16:H | 1379:O | 0.018 |
| 16O | 1381:H | 1.000 |
| 18:H | 1382:OD1(OD2) | 1.000 |
| 23:HH12(HH11,HH21,HH22) | 1373:O | 0.355 |
| 23:HH22(HH11,HH12,HH21) | 1373:O | 0.355 |
| 25:OD2(OD1) | 1378:HH | 0.964 |
| 32:HH12(HH11,HH21,HH22) | 1471:OD2(OD1) | 0.891 |
| 32:HH22(HH11,HH12,HH21) | 1471:OD2(OD1) | 0.891 |
| 43:H | 1407:OG | 0.609 |
| 44:HD22(HD21) | 1470:O | 0.900 |
| Total: | | 7.98 |
| Average: | | 0.726 |

**Table 2.8.** **Individual, total and average hydrogen bond persistence in a binding pose metadynamics simulation of the K92-C5 complex.**

| **HBond K92** | **HBond C5** | **Persistence score** |
| --- | --- | --- |
| 13:O | 533:HD21(HD22) | 0.909 |
| 22:H | 81:OD1 | 0.209 |
| 23:O | 38:HD22(HD21) | 0.536 |
| 24:O | 512:H | 0.536 |
| 25:HE2 | 80:O | 0.545 |
| Total: | | 2.74 |
| Average: | | 0.547 |

**Section 3. Solution structure analysis**

**Table 3.1. SAXS summary data.**

| **Data collection parameters** | **C5** | **C5-K8** | | **C5-K57** | | **C5-K92** | **CK-149:** |
| --- | --- | --- | --- | --- | --- | --- | --- |
| Instrument | EMBL P12 (PETRA III, DESY, Hamburg) | | | | | | |
| Beam geometry (mm2) | 0.2×0.12 | | | | | | |
| Wavelength (nm) | 12.4 | | | | | | |
| *s* range (nm-1) | 0.03-7.1 | | | | | | |
| Temperature (K) | 293 | | | | | | |
| Concentration range (ml) | 5.96 | | | | | | |
| **SEC parameters** |  | | | | | | |
| Column | Superdex 200 Increase 5/150 column | | | | | | |
| Buffer | 20mM Tris pH 7.35, 75mM NaCl, and 3% glycerol | | | | | | |
| Flow rate, duration | 0.35 ml/min; 15 min (900 frames) | | | | | | |
| **Structural parameters** |  | |  | |  | | |
| *R*g (nm) (from *P*(*r*)) | 4.8 ± 0.1 | 5.4 ± 0.1 | | 5.2 ± 0.1 | | 5.0 ± 0.1 | 4.9 ± 0.1 |
| *R*g (nm) (from Guinier plot) | 4.8 ± 0.1 | 5.4 ± 0.1 | | 5.3 ± 0.1 | | 5.1 ± 0.1 | 5.0 ± 0.1 |
| *D*max (nm) | 17.6 ± 0.5 | 18.3 ± 10 | | 19 ± 0.5 | | 19 ± 0.5 | 18.5 ± 0.5 |
| Porod volume estimate, Vp (nm3) | 390 ± 10 | 450 ± 10 | | 410 ± 10 | | 410 ± 10 | 410 ± 10 |
| **Molecular weight determination (kDa)** |  |  | |  | |  |  |
| From volume of correlation, VC | 210 ± 20 | 240 ± 25 | | 230 ± 25 | | 220 ± 22 | 220 ± 22 |
| From *MALLS* | 188 ± 9 | 200 ± 10 | | 199 ± 10 | | 197 ± 10 | 195 ± 10 |
| Calculated monomeric *MW* from sequence | 186 | 192 | | 190 | | 191.5 | 190 |
| **Software employed** |  |  | |  | |  |  |
| Primary data reduction | SASFLOW | | | | | | |
| Data processing | CHROMIXS/PRIMUS | | | | | | |
| Computation of model intensities | CRYSOL | | | | | | |
| normal mode analysis | SREFLEX | | | | | | |

**Table 3.2. ΔHDX summary data.**

| Data set | **ΔHDX = (C5 + K8) – (C5)** | **ΔHDX = (C5 + K57) – (C5)** | **ΔHDX = (C5 + K92) – (C5)** |
| --- | --- | --- | --- |
| Protein buffer conditions | PBS, pH 7.2 | | |
| Deuterium time course analysed | 30, 120, 900 and 3600 sec | | |
| Number of peptides | 248 | 188 | 156 |
| Sequence coverage | 73.3 % | 67.0 % | 61.3 % |
| Redundancy | 2.43 | 2.10 | 2.43 |
| Replicates | Triplicates | | |
| Average standard deviation | 0.06 | 0.08 | 0.09 |
| Significant differences at 1 hour ΔHDX* | CI 98% = 0± 24 Da | CI 98% = 0± 33 Da | CI 98% = 0± 39 Da |

* To compare significant differences, a T-test with α=0.02 was used. Only peptides which satisfied a ΔHDX confidence interval of 98 % were considered significant.

**Section 4. Additional functional analyses**

**Table 4.1. SPR single-cycle kinetics of knob domains binding to human C5b.**

summary of *n=3*

|  | **Chi² (RU²)** | **mean kon (1/Ms)** | **mean koff (1/s)** | **mean KD (M)** | **Mean stoichiometric ratio** | **comment** |
| --- | --- | --- | --- | --- | --- | --- |
| K8 | - | - | - | - | 0.1 | Non-binding |
| K92 | 0.04 | 1.14E+05 | 6.20E-05 | 5.48E-10 | 0.4 |  |
| K57 | 0.07 | 2.51E+05 | 3.54E-04 | 1.41E-09 | 0.4 |  |
| K149 | 0.03 | 7.49E+05 | 3.76E-03 | 5.02E-09 | 0.4 |  |

*n=1*

|  | **Chi² (RU²)** | **kon (1/Ms)** | **koff (1/s)** | **KD (M)** | **Rmax (RU)** | **Stoichiometric ratio** | **comment** |
| --- | --- | --- | --- | --- | --- | --- | --- |
| K8 | - | - | - | - | 2.1 | 0.1 | Non-binding |
| K92 | 0.06 | 1.11E+05 | 5.20E-05 | 4.67E-10 | 5.4 | 0.4 |  |
| K57 | 0.05 | 2.73E+05 | 3.75E-04 | 1.37E-09 | 6.2 | 0.4 |  |
| K149 | 0.03 | 7.56E+05 | 3.65E-03 | 4.83E-09 | 2.8 | 0.3 |  |

*n=2*

|  | **Chi² (RU²)** | **kon (1/Ms)** | **koff (1/s)** | **KD (M)** | **Rmax (RU)** | **Stoichiometric ratio** | **comment** |
| --- | --- | --- | --- | --- | --- | --- | --- |
| K8 | - | - | - | - | 2.4 | 0.1 | Non-binding |
| K92 | 0.03 | 1.10E+05 | 7.68E-05 | 6.99E-10 | 5.2 | 0.4 |  |
| K57 | 0.08 | 2.40E+05 | 3.46E-04 | 1.44E-09 | 8.2 | 0.4 |  |
| k149 | 0.03 | 7.80E+05 | 3.99E-03 | 5.11E-09 | 5.1 | 0.4 |  |

*n=3*

|  | **Chi² (RU²)** | **kon (1/Ms)** | **koff (1/s)** | **KD (M)** | **Rmax (RU)** | **Stoichiometric ratio** | **comment** |
| --- | --- | --- | --- | --- | --- | --- | --- |
| K8 | - | - | - | - | 2.6 | 0.2 | Non-binding |
| K92 | 0.03 | 1.20E+05 | 5.73E-05 | 4.78E-10 | 4.7 | 0.3 |  |
| K57 | 0.08 | 2.38E+05 | 3.42E-04 | 1.43E-09 | 7.9 | 0.4 |  |
| K149 | 0.03 | 7.12E+05 | 3.65E-03 | 5.13E-09 | 5.2 | 0.4 |  |

Example sensorgrams and curve fits (1:1 binding model) are shown with summary kinetics from *n=3* experiments.


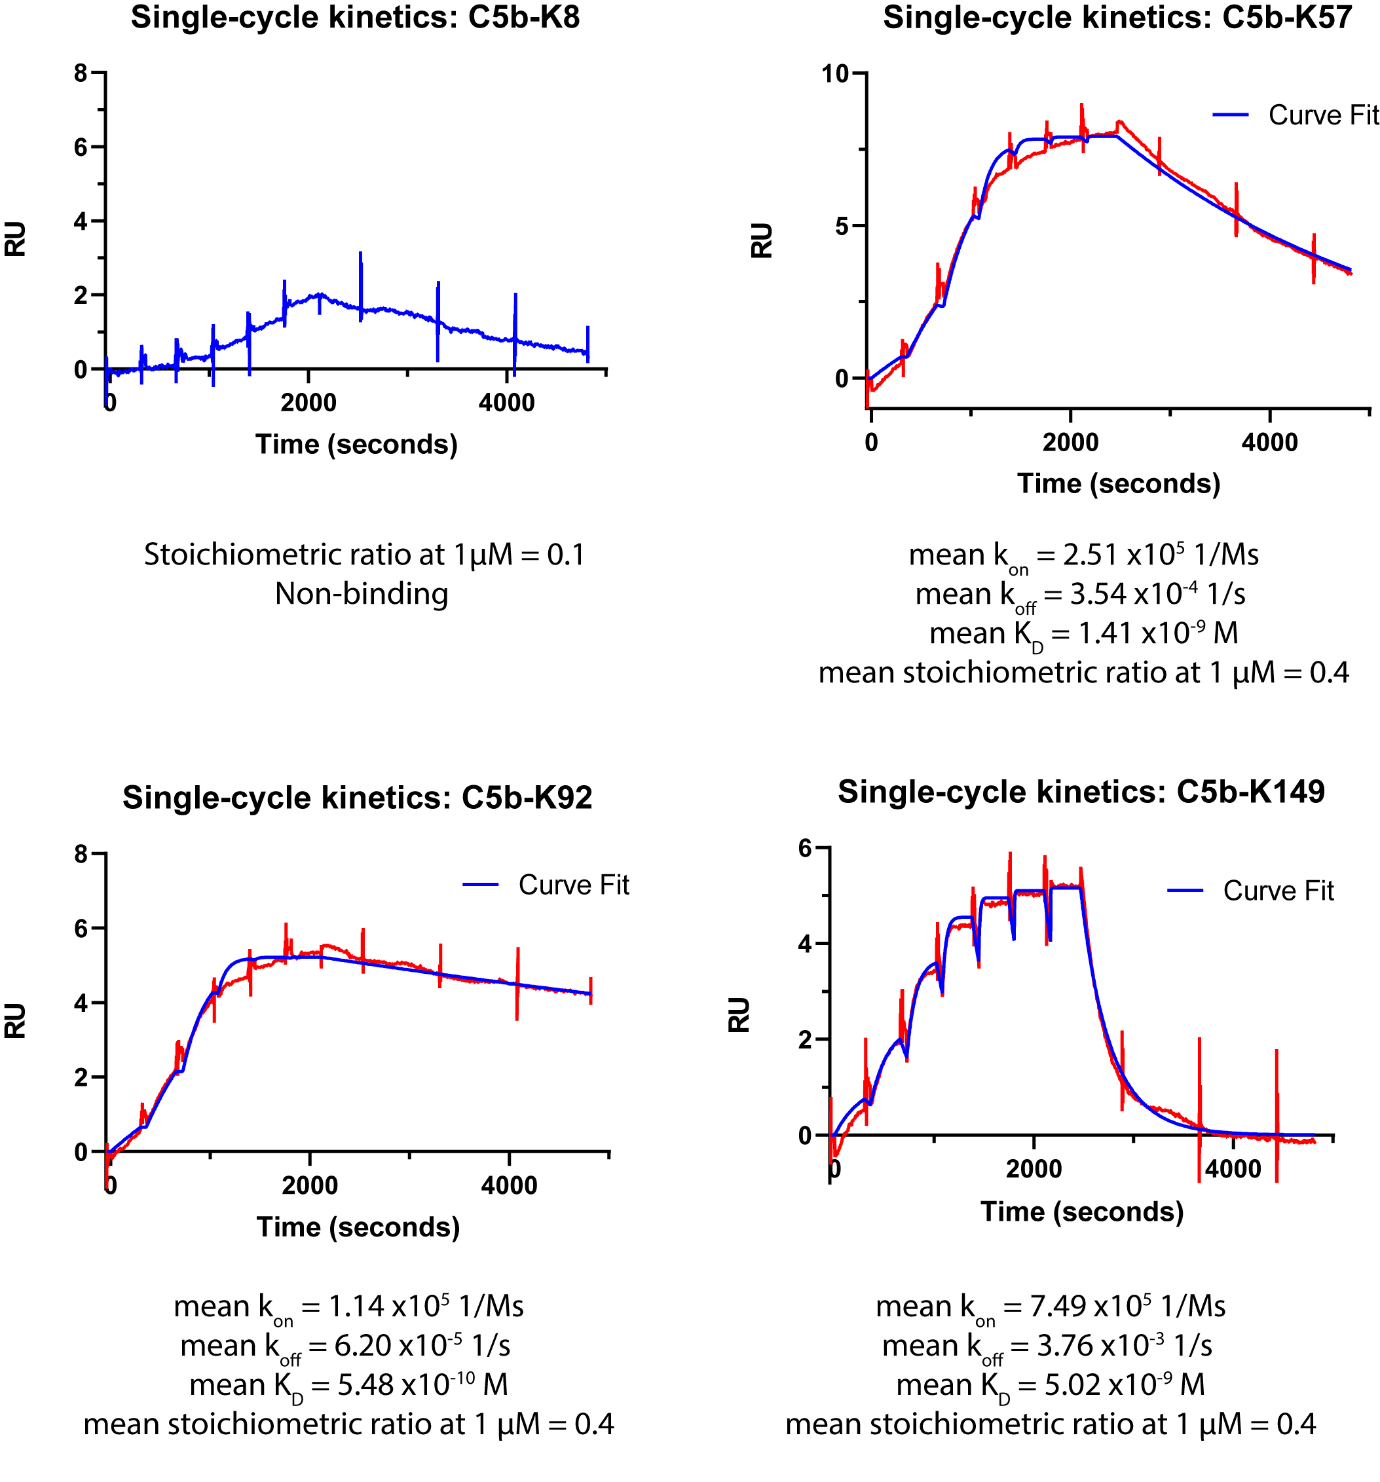


**Table 4.2. SPR single-cycle kinetics of knob domains binding to human C5b-6.**

summary of *n=4*

|  | **mean kon (1/Ms)** | **mean koff (1/s)** | **mean KD (M)** | **Mean stoichiometric ratio** |
| --- | --- | --- | --- | --- |
| K8 | 1.25E+04 | 2.95E-04 | 2.43E-08 | 0.4 |
| K57 | 1.50E+05 | 5.93E-04 | 3.91E-09 | 0.8 |
| K92 | 1.36E+04 | 8.12E-05 | 6.18E-09 | 0.5 |
| K149 | 1.24E+06 | 4.88E-03 | 3.98E-09 | 0.7 |

*n=1*

|  | **Chi² (RU²)** | **kon (1/Ms)** | **koff (1/s)** | **KD (M)** | **Rmax (RU)** | **Stoichiometric ratio** |
| --- | --- | --- | --- | --- | --- | --- |
| K8 | 4.57E-02 | 1.01E+04 | 2.82E-04 | 2.78E-08 | 6.1 | 0.3 |
| K57 | 5.21E-02 | 1.48E+05 | 5.72E-04 | 3.87E-09 | 9.7 | 0.7 |
| K92 | 8.49E-02 | 1.16E+04 | 9.65E-05 | 8.33E-09 | 9.5 | 0.5 |
| K149 | 2.75E-01 | 1.33E+06 | 4.78E-03 | 3.58E-09 | 7.2 | 0.7 |

*n=2*

|  | **Chi² (RU²)** | **kon (1/Ms)** | **koff (1/s)** | **KD (M)** | **Rmax (RU)** | **Stoichiometric ratio** |
| --- | --- | --- | --- | --- | --- | --- |
| K8 | 1.41E-02 | 1.21E+04 | 3.84E-04 | 3.17E-08 | 5.4 | 0.3 |
| K57 | 2.60E-02 | 1.41E+05 | 4.81E-04 | 3.40E-09 | 11.7 | 0.7 |
| K92 | 1.91E-02 | 1.27E+04 | 9.86E-05 | 7.77E-09 | 9.8 | 0.5 |
| K149 | 1.80E-01 | 1.30E+06 | 4.39E-03 | 3.37E-09 | 6.9 | 0.6 |

*n=3*

|  | **Chi² (RU²)** | **kon (1/Ms)** | **koff (1/s)** | **KD (M)** | **Rmax (RU)** | **Stoichiometric ratio** |
| --- | --- | --- | --- | --- | --- | --- |
| K8 | 1.94E-01 | 1.21E+04 | 2.40E-04 | 1.98E-08 | 11.8 | 0.5 |
| K57 | 1.51E-01 | 1.65E+05 | 8.14E-04 | 4.92E-09 | 14.6 | 0.8 |
| K92 | 5.49E-02 | 1.54E+04 | 6.78E-05 | 4.42E-09 | 14.1 | 0.6 |
| K149 | 2.85E-01 | 1.18E+06 | 5.37E-03 | 4.53E-09 | 10.3 | 0.8 |

*n=4*

|  | **Chi² (RU²)** | **kon (1/Ms)** | **koff (1/s)** | **KD (M)** | **Rmax (RU)** | **Stoichiometric ratio** |
| --- | --- | --- | --- | --- | --- | --- |
| K8 | 7.38E-02 | 1.56E+04 | 2.77E-04 | 1.77E-08 | 7.6 | 0.3 |
| K57 | 1.38E-01 | 1.47E+05 | 5.05E-04 | 3.43E-09 | 16.1 | 0.9 |
| K92 | 5.62E-02 | 1.48E+04 | 6.19E-05 | 4.19E-09 | 14.3 | 0.6 |
| K149 | 4.26E-02 | 1.12E+06 | 4.97E-03 | 4.42E-09 | 10.8 | 0.8 |

Example sensorgrams and curve fits (1:1 binding model) are shown with summary kinetics from *n=3* experiments.


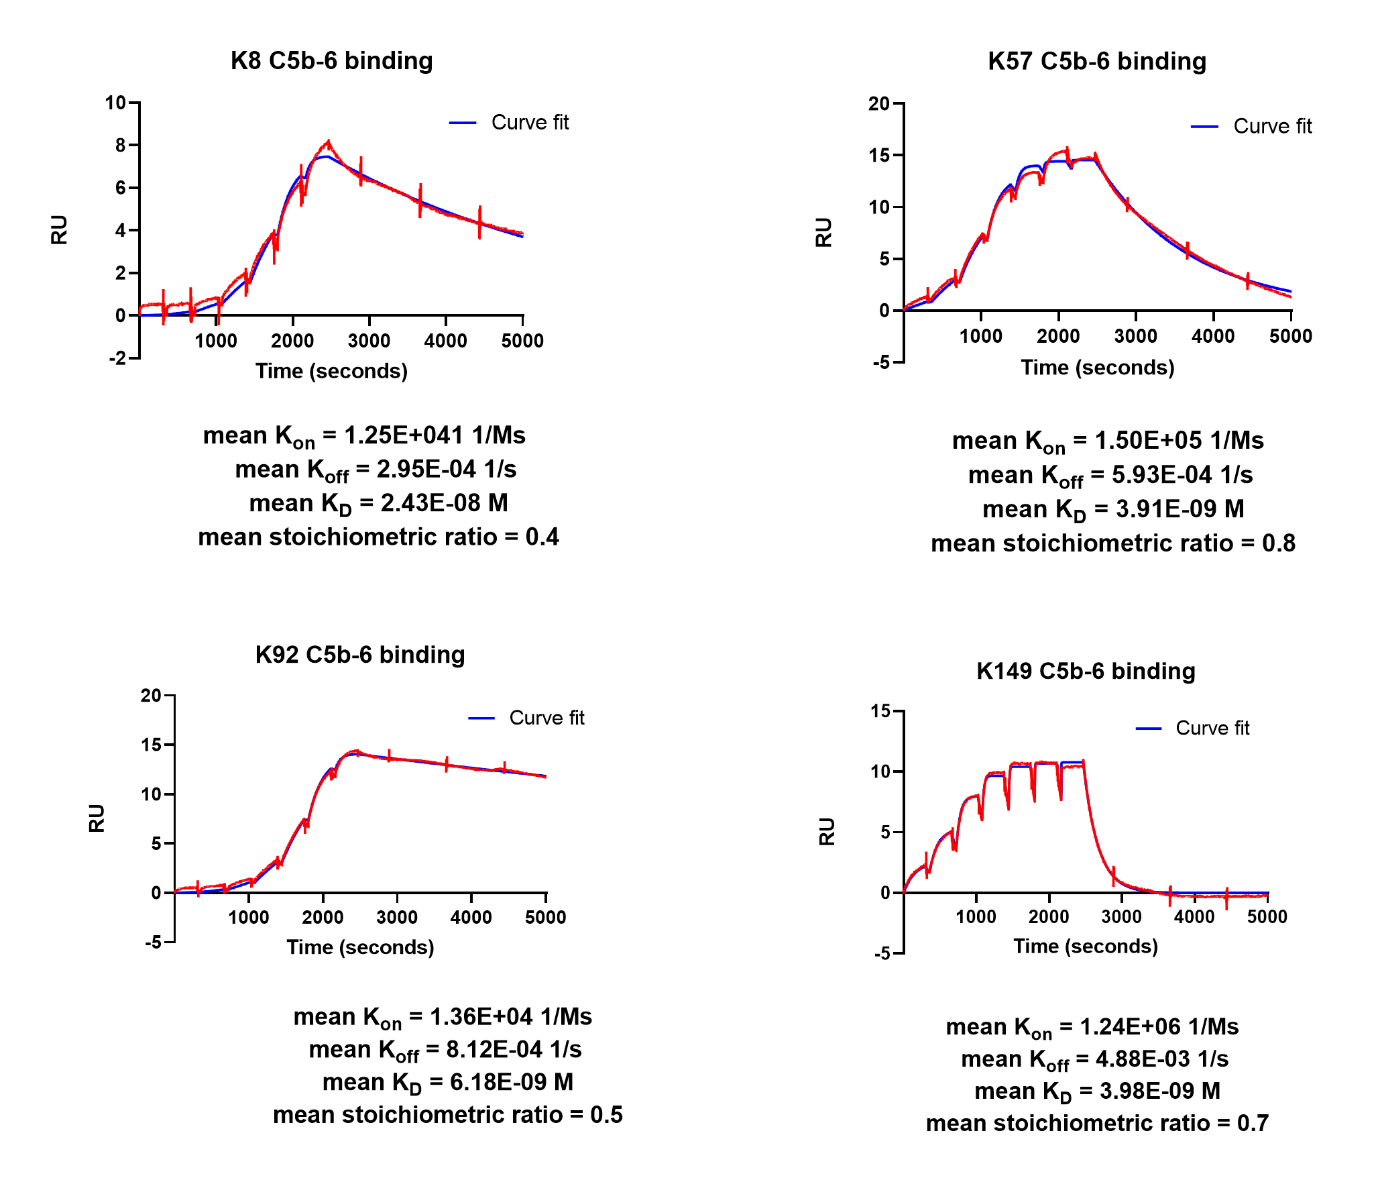

Supplement: Supplementary file 1. [file elife-63586-supp1.docx]
